# Supplementary material for: The Effect of Low Irradiance on Leaf Nitrogen Allocation and Mesophyll Conductance to CO2 in Seedlings of Four Tree Species in Subtropical China
Source: MDPI journal article supplement (doi:10.3390/plants10102213), 2021-10-18
Supplement: s1 [file s1]

# The Effect of Low Irradiance on Leaf Nitrogen Allocation and Mesophyll Conductance to CO<sub>2</sub> in Seedlings of Four Tree Species in Subtropical China

Jingchao Tang <sup>1,2</sup>, Baodi Sun <sup>1</sup>, Ruimei Cheng <sup>2,3</sup>, Zuomin Shi <sup>2,3,4,\*</sup>, Da Luo <sup>2</sup>, Shirong Liu <sup>2</sup> and Mauro Centritto <sup>4</sup>

<sup>1</sup> School of Environmental and Municipal Engineering, Qingdao University of Technology,  
266525 Qingdao, China; tjc@qut.edu.cn (J.T.); sunbaodi0927@126.com (B.S.)

<sup>2</sup> Key Laboratory of Forest Ecology and Environment of National Forestry and Grassland Administration, Research Institute of Forest Ecology, Environment  
and Protection, Chinese Academy of Forestry,  
100091 Beijing, China; chengrm@caf.ac.cn (R.C.); luoda2010@163.com (D.L.); liusr@caf.ac.cn (S.L.)

<sup>3</sup> Co-Innovation Center for Sustainable Forestry in Southern China, Nanjing Forestry University,  
210037 Nanjing, China

<sup>4</sup> Institute for Sustainable Plant Protection, National Research Council of Italy, Strada delle Cacce 73,  
10135 Torino, Italy; mauro.centritto@cnr.it

\* Correspondence: Correspondence: shizm@caf.ac.cn; Tel.: +86-010-62888308

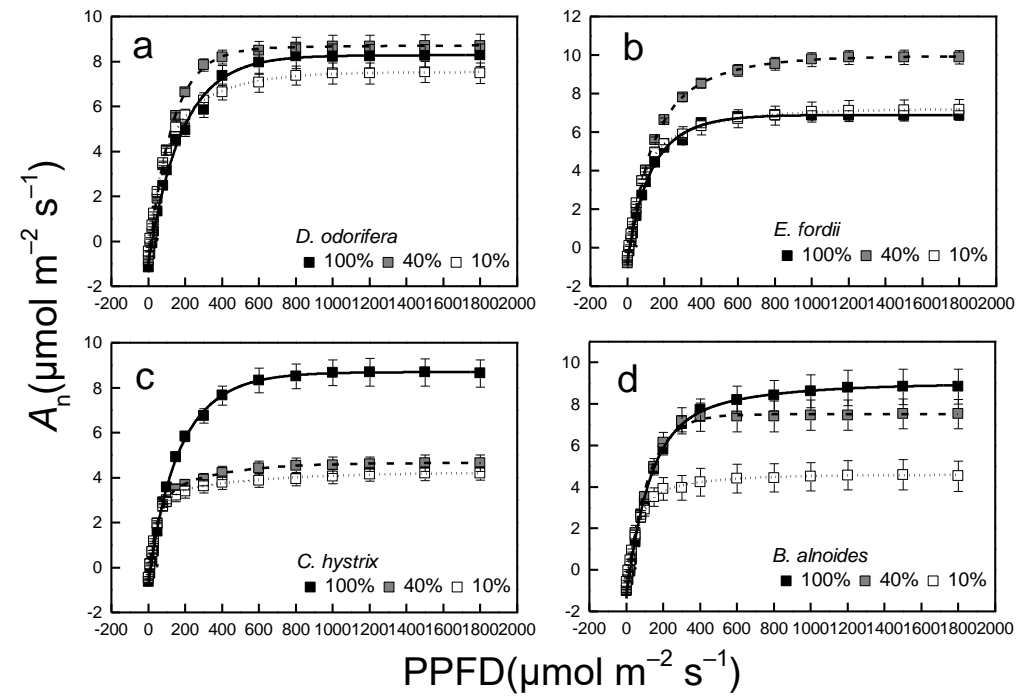

**Figure S1.**  $A_n$ -PPFD curves in *Dalbergia odorifera*, *Erythrophleum fordii*, *Betula alnoides*, and *Castanopsis hystrix* grown under three different irradiance treatments. Data are means of seven plants per treatment  $\pm$  SE.

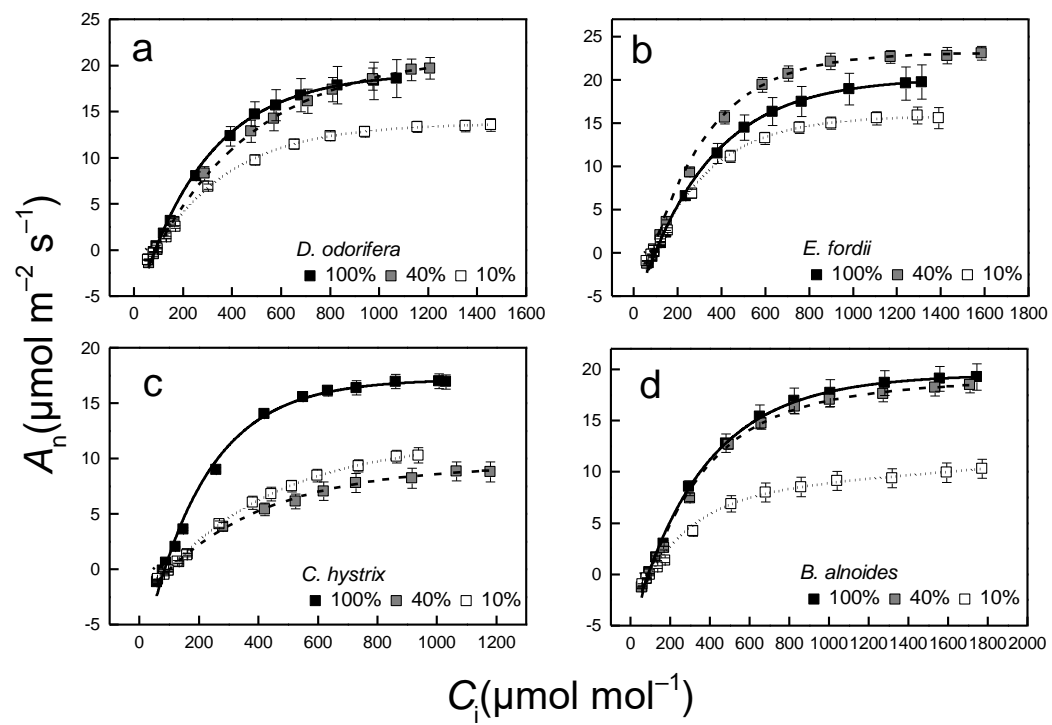

**Figure S2.**  $A_n$ - $C_i$  curves in *Dalbergia odorifera*, *Erythrophleum fordii*, *Betula alnoides*, and *Castanopsis hystrix* grown under three different irradiance treatments. Data are means of seven plants per treatment  $\pm$  SE.

**Table S1** Mesophyll conductance ( $g_m$ ), and CO<sub>2</sub> concentration at carboxylation site ( $C_c$ ) calculated by three methods in four species seedling leaves under different irradiance treatments. Data are means of seven plants per treatment  $\pm$  SE. Lower case letters indicate significant difference at 0.05 levels among the irradiance treatments, whereas capital letters indicate significant difference at 0.05 levels among species under same irradiance treatment.  $F$ -ratios with statistically significant values denoted by \* $P < 0.05$ , \*\* $P < 0.01$ , \*\*\* $P < 0.001$  among irradiance treatment.

| Tree species        | N treatments | $g_m(\text{molCO}_2 \text{ m}^{-2} \text{ s}^{-1})$ Harley | $g_m(\text{molCO}_2 \text{ m}^{-2} \text{ s}^{-1})$ Ethier | $g_m(\text{molCO}_2 \text{ m}^{-2} \text{ s}^{-1})$ Gu | $C_c(\mu\text{mol mol}^{-1})$ Harley | $C_c(\mu\text{mol mol}^{-1})$ Ethier | $C_c(\mu\text{mol mol}^{-1})$ Gu   |
|---------------------|--------------|------------------------------------------------------------|------------------------------------------------------------|--------------------------------------------------------|--------------------------------------|--------------------------------------|------------------------------------|
| <i>D. odorifera</i> | HL           | 0.114 $\pm$ 0.013 <sup>aA</sup>                            | 0.140 $\pm$ 0.011 <sup>aA</sup>                            | 0.159 $\pm$ 0.006 <sup>aA</sup>                        | 178.394 $\pm$ 7.837 <sup>bB</sup>    | 192.993 $\pm$ 7.111 <sup>bB</sup>    | 200.924 $\pm$ 6.715 <sup>bA</sup>  |
|                     | ML           | 0.101 $\pm$ 0.006 <sup>aA</sup>                            | 0.107 $\pm$ 0.006 <sup>bA</sup>                            | 0.115 $\pm$ 0.006 <sup>bA</sup>                        | 204.861 $\pm$ 9.132 <sup>abA</sup>   | 209.466 $\pm$ 8.782 <sup>abA</sup>   | 215.546 $\pm$ 9.468 <sup>abA</sup> |
|                     | LL           | 0.097 $\pm$ 0.006 <sup>aA</sup>                            | 0.101 $\pm$ 0.010 <sup>bA</sup>                            | 0.102 $\pm$ 0.007 <sup>bA</sup>                        | 229.974 $\pm$ 5.705 <sup>aA</sup>    | 230.803 $\pm$ 7.631 <sup>aA</sup>    | 233.247 $\pm$ 6.121 <sup>aA</sup>  |
|                     | $F$          | 0.919*                                                     | 5.326*                                                     | 24.179***                                              | 11.254**                             | 5.799*                               | 4.565*                             |
| <i>E. fordii</i>    | HL           | 0.068 $\pm$ 0.007 <sup>bB</sup>                            | 0.066 $\pm$ 0.007 <sup>bC</sup>                            | 0.063 $\pm$ 0.007 <sup>aB</sup>                        | 136.804 $\pm$ 5.186 <sup>bC</sup>    | 133.559 $\pm$ 7.949 <sup>bC</sup>    | 127.420 $\pm$ 9.562 <sup>bB</sup>  |
|                     | ML           | 0.090 $\pm$ 0.005 <sup>aA</sup>                            | 0.097 $\pm$ 0.003 <sup>aA</sup>                            | 0.102 $\pm$ 0.004 <sup>bA</sup>                        | 149.830 $\pm$ 2.997 <sup>abB</sup>   | 158.317 $\pm$ 4.972 <sup>aB</sup>    | 162.294 $\pm$ 5.094 <sup>aB</sup>  |
|                     | LL           | 0.069 $\pm$ 0.005 <sup>bB</sup>                            | 0.076 $\pm$ 0.005 <sup>bAB</sup>                           | 0.077 $\pm$ 0.004 <sup>aB</sup>                        | 165.191 $\pm$ 5.735 <sup>aB</sup>    | 174.213 $\pm$ 3.991 <sup>aB</sup>    | 175.534 $\pm$ 4.659 <sup>aB</sup>  |
|                     | $F$          | 4.389*                                                     | 9.575**                                                    | 14.780***                                              | 8.809**                              | 12.128***                            | 13.324***                          |
| <i>C. hystrix</i>   | HL           | 0.109 $\pm$ 0.006 <sup>aAB</sup>                           | 0.099 $\pm$ 0.004 <sup>aBC</sup>                           | 0.087 $\pm$ 0.008 <sup>aB</sup>                        | 172.173 $\pm$ 6.100 <sup>bB</sup>    | 173.927 $\pm$ 3.732 <sup>aB</sup>    | 157.856 $\pm$ 9.558 <sup>bB</sup>  |
|                     | ML           | 0.051 $\pm$ 0.006 <sup>bB</sup>                            | 0.054 $\pm$ 0.005 <sup>bB</sup>                            | 0.055 $\pm$ 0.006 <sup>bB</sup>                        | 203.053 $\pm$ 3.562 <sup>aA</sup>    | 193.010 $\pm$ 7.087 <sup>aA</sup>    | 193.255 $\pm$ 7.793 <sup>aAB</sup> |
|                     | LL           | 0.050 $\pm$ 0.006 <sup>bB</sup>                            | 0.052 $\pm$ 0.005 <sup>bB</sup>                            | 0.057 $\pm$ 0.005 <sup>bB</sup>                        | 182.809 $\pm$ 5.973 <sup>bB</sup>    | 184.806 $\pm$ 5.946 <sup>aB</sup>    | 191.789 $\pm$ 7.410 <sup>aB</sup>  |
|                     | $F$          | 33.111***                                                  | 30.453***                                                  | 7.402**                                                | 8.626**                              | 2.763                                | 5.813*                             |
| <i>B. alnoides</i>  | HL           | 0.136 $\pm$ 0.013 <sup>aA</sup>                            | 0.129 $\pm$ 0.011 <sup>aAB</sup>                           | 0.138 $\pm$ 0.016 <sup>aA</sup>                        | 228.781 $\pm$ 8.439 <sup>aA</sup>    | 224.911 $\pm$ 9.124 <sup>aA</sup>    | 225.576 $\pm$ 12.271 <sup>aA</sup> |
|                     | ML           | 0.101 $\pm$ 0.010 <sup>aA</sup>                            | 0.103 $\pm$ 0.008 <sup>aA</sup>                            | 0.108 $\pm$ 0.009 <sup>aA</sup>                        | 220.277 $\pm$ 13.165 <sup>aA</sup>   | 222.796 $\pm$ 11.669 <sup>aA</sup>   | 225.750 $\pm$ 11.857 <sup>aA</sup> |
|                     | LL           | 0.053 $\pm$ 0.009 <sup>bB</sup>                            | 0.056 $\pm$ 0.009 <sup>bB</sup>                            | 0.059 $\pm$ 0.008 <sup>bB</sup>                        | 227.034 $\pm$ 9.417 <sup>aA</sup>    | 231.153 $\pm$ 9.229 <sup>aA</sup>    | 238.020 $\pm$ 9.285 <sup>aA</sup>  |
|                     | $F$          | 15.102***                                                  | 15.266***                                                  | 12.250***                                              | 0.182                                | 0.186                                | 0.405                              |

**Table S2** Quantity of leaf N per area allocated to Rubisco ( $Q_{\text{Rarea}}$ ), bioenergetics ( $Q_{\text{Barea}}$ ), light-harvesting components ( $Q_{\text{Larea}}$ ), photosynthetic apparatus ( $Q_{\text{Parea}}$ ), cell wall ( $Q_{\text{CWarea}}$ ), and other parts ( $Q_{\text{Other-area}}$ ) in four species seedling leaves under different irradiance treatments. Data are means of seven plants per treatment  $\pm$  SE. Lower case letters indicate significant difference at 0.05 levels among the irradiance treatments, whereas capital letters indicate significant difference at 0.05 levels among species under same irradiance treatment.  $F$ -ratios with statistically significant values denoted by \* $P < 0.05$ , \*\* $P < 0.01$ , \*\*\* $P < 0.001$  among irradiance treatment.

| Tree species        | N treatments | $Q_{\text{Rarea}}(\text{g}\cdot\text{m}^{-2})$ | $Q_{\text{Barea}}(\text{g}\cdot\text{m}^{-2})$ | $Q_{\text{Larea}}(\text{g}\cdot\text{m}^{-2})$ | $Q_{\text{Parea}}(\text{g}\cdot\text{m}^{-2})$ | $Q_{\text{CWarea}}(\text{g}\cdot\text{m}^{-2})$ | $Q_{\text{Other-area}}(\text{g}\cdot\text{m}^{-2})$ |
|---------------------|--------------|------------------------------------------------|------------------------------------------------|------------------------------------------------|------------------------------------------------|-------------------------------------------------|-----------------------------------------------------|
| <i>D. odorifera</i> | HL           | 0.288 $\pm$ 0.012 <sup>abAB</sup>              | 0.064 $\pm$ 0.004 <sup>aB</sup>                | 0.224 $\pm$ 0.011 <sup>aA</sup>                | 0.577 $\pm$ 0.019 <sup>aA</sup>                | 0.150 $\pm$ 0.015 <sup>B</sup>                  | 1.459 $\pm$ 0.114 <sup>aA</sup>                     |
|                     | ML           | 0.324 $\pm$ 0.028 <sup>aB</sup>                | 0.076 $\pm$ 0.004 <sup>aB</sup>                | 0.213 $\pm$ 0.004 <sup>aA</sup>                | 0.614 $\pm$ 0.031 <sup>aB</sup>                | 0.107 $\pm$ 0.010 <sup>bC</sup>                 | 0.894 $\pm$ 0.043 <sup>bA</sup>                     |
|                     | LL           | 0.232 $\pm$ 0.011 <sup>bC</sup>                | 0.052 $\pm$ 0.002 <sup>bB</sup>                | 0.176 $\pm$ 0.004 <sup>bBC</sup>               | 0.459 $\pm$ 0.014 <sup>bB</sup>                | 0.059 $\pm$ 0.004 <sup>cB</sup>                 | 0.449 $\pm$ 0.036 <sup>cB</sup>                     |
|                     | $F$          | 6.189**                                        | 12.718***                                      | 13.703***                                      | 12.575***                                      | 18.036***                                       | 47.921***                                           |
| <i>E. fordii</i>    | HL           | 0.330 $\pm$ 0.029 <sup>bA</sup>                | 0.085 $\pm$ 0.008 <sup>bA</sup>                | 0.117 $\pm$ 0.017 <sup>bB</sup>                | 0.532 $\pm$ 0.042 <sup>bAB</sup>               | 0.103 $\pm$ 0.005 <sup>aB</sup>                 | 1.372 $\pm$ 0.099 <sup>aA</sup>                     |
|                     | ML           | 0.469 $\pm$ 0.019 <sup>aA</sup>                | 0.115 $\pm$ 0.005 <sup>aA</sup>                | 0.225 $\pm$ 0.009 <sup>aA</sup>                | 0.808 $\pm$ 0.013 <sup>aA</sup>                | 0.066 $\pm$ 0.001 <sup>bD</sup>                 | 0.875 $\pm$ 0.022 <sup>bA</sup>                     |
|                     | LL           | 0.317 $\pm$ 0.021 <sup>bA</sup>                | 0.064 $\pm$ 0.002 <sup>cA</sup>                | 0.234 $\pm$ 0.016 <sup>aA</sup>                | 0.614 $\pm$ 0.033 <sup>bA</sup>                | 0.060 $\pm$ 0.003 <sup>bB</sup>                 | 0.883 $\pm$ 0.028 <sup>bA</sup>                     |
|                     | $F$          | 13.144***                                      | 21.504***                                      | 19.625***                                      | 20.426***                                      | 41.742***                                       | 22.028***                                           |
| <i>C. hystrix</i>   | HL           | 0.308 $\pm$ 0.010 <sup>aAB</sup>               | 0.069 $\pm$ 0.002 <sup>aAB</sup>               | 0.073 $\pm$ 0.008 <sup>bB</sup>                | 0.450 $\pm$ 0.015 <sup>aBC</sup>               | 0.273 $\pm$ 0.013 <sup>bA</sup>                 | 0.299 $\pm$ 0.023 <sup>aB</sup>                     |
|                     | ML           | 0.170 $\pm$ 0.008 <sup>bC</sup>                | 0.036 $\pm$ 0.003 <sup>bC</sup>                | 0.096 $\pm$ 0.009 <sup>abB</sup>               | 0.302 $\pm$ 0.013 <sup>cD</sup>                | 0.329 $\pm$ 0.007 <sup>aA</sup>                 | 0.123 $\pm$ 0.055 <sup>bB</sup>                     |
|                     | LL           | 0.195 $\pm$ 0.009 <sup>bBC</sup>               | 0.043 $\pm$ 0.003 <sup>bBC</sup>               | 0.131 $\pm$ 0.015 <sup>aBC</sup>               | 0.369 $\pm$ 0.022 <sup>bBC</sup>               | 0.267 $\pm$ 0.018 <sup>bA</sup>                 | 0.153 $\pm$ 0.027 <sup>bC</sup>                     |
|                     | $F$          | 71.560***                                      | 48.291***                                      | 7.117**                                        | 19.017***                                      | 6.431**                                         | 6.192**                                             |
| <i>B. alnoides</i>  | HL           | 0.250 $\pm$ 0.006 <sup>aB</sup>                | 0.064 $\pm$ 0.004 <sup>aB</sup>                | 0.116 $\pm$ 0.009 <sup>aB</sup>                | 0.430 $\pm$ 0.011 <sup>aC</sup>                | 0.230 $\pm$ 0.029 <sup>aA</sup>                 | 0.372 $\pm$ 0.068 <sup>aB</sup>                     |
|                     | ML           | 0.273 $\pm$ 0.015 <sup>aB</sup>                | 0.067 $\pm$ 0.004 <sup>aB</sup>                | 0.090 $\pm$ 0.007 <sup>aB</sup>                | 0.430 $\pm$ 0.024 <sup>aC</sup>                | 0.150 $\pm$ 0.016 <sup>bB</sup>                 | 0.173 $\pm$ 0.028 <sup>bB</sup>                     |
|                     | LL           | 0.157 $\pm$ 0.016 <sup>bB</sup>                | 0.035 $\pm$ 0.003 <sup>bC</sup>                | 0.098 $\pm$ 0.007 <sup>aC</sup>                | 0.291 $\pm$ 0.023 <sup>bC</sup>                | 0.085 $\pm$ 0.011 <sup>cB</sup>                 | 0.184 $\pm$ 0.015 <sup>bC</sup>                     |
|                     | $F$          | 20.767***                                      | 21.539***                                      | 2.781                                          | 15.374***                                      | 12.978***                                       | 6.674**                                             |

**Table S3** Quantity of leaf N per mass allocated to Rubisco ( $Q_{Rmass}$ ), bioenergetics ( $Q_{Bmass}$ ), light-harvesting components ( $Q_{Lmass}$ ), photosynthetic apparatus ( $Q_{Pmass}$ ), cell wall ( $Q_{CWmass}$ ), and other parts ( $Q_{Other-mass}$ ) in four species seedling leaves under different irradiance treatments. Data are means of seven plants per treatment  $\pm$  SE. Lower case letters indicate significant difference at 0.05 levels among the irradiance treatments, whereas capital letters indicate significant difference at 0.05 levels among species under same irradiance treatment. *F*-ratios with statistically significant values denoted by \* $P < 0.05$ , \*\* $P < 0.01$ , \*\*\* $P < 0.001$  among irradiance treatment.

| Tree species        | N treatments | $Q_{Rmass}(mg \cdot g^{-1})$     | $Q_{Bmass}(mg \cdot g^{-1})$     | $Q_{Lmass}(mg \cdot g^{-1})$    | $Q_{Pmass}(mg \cdot g^{-1})$     | $Q_{CWmass}(mg \cdot g^{-1})$    | $Q_{Other-mass}(mg \cdot g^{-1})$ |
|---------------------|--------------|----------------------------------|----------------------------------|---------------------------------|----------------------------------|----------------------------------|-----------------------------------|
| <i>D. odorifera</i> | HL           | 4.241 $\pm$ 0.236 <sup>bA</sup>  | 0.940 $\pm$ 0.033 <sup>cAB</sup> | 3.316 $\pm$ 0.253 <sup>cA</sup> | 8.498 $\pm$ 0.457 <sup>cA</sup>  | 2.159 $\pm$ 0.156 <sup>aB</sup>  | 21.045 $\pm$ 0.857 <sup>aA</sup>  |
|                     | ML           | 6.293 $\pm$ 0.608 <sup>bB</sup>  | 1.474 $\pm$ 0.097 <sup>bB</sup>  | 4.121 $\pm$ 0.065 <sup>bA</sup> | 11.888 $\pm$ 0.739 <sup>bB</sup> | 2.067 $\pm$ 0.177 <sup>aC</sup>  | 17.219 $\pm$ 0.646 <sup>bA</sup>  |
|                     | LL           | 7.950 $\pm$ 0.464 <sup>aA</sup>  | 1.767 $\pm$ 0.088 <sup>aA</sup>  | 6.007 $\pm$ 0.084 <sup>aA</sup> | 15.724 $\pm$ 0.586 <sup>aA</sup> | 2.008 $\pm$ 0.148 <sup>aC</sup>  | 15.276 $\pm$ 1.107 <sup>bB</sup>  |
|                     | <i>F</i>     | 16.151***                        | 28.712***                        | 76.204***                       | 35.719***                        | 0.222                            | 10.867**                          |
| <i>E. fordii</i>    | HL           | 4.611 $\pm$ 0.391 <sup>cA</sup>  | 1.192 $\pm$ 0.104 <sup>bA</sup>  | 1.639 $\pm$ 0.239 <sup>cB</sup> | 7.442 $\pm$ 0.559 <sup>bAB</sup> | 1.442 $\pm$ 0.060 <sup>aC</sup>  | 19.202 $\pm$ 1.265 <sup>abA</sup> |
|                     | ML           | 8.836 $\pm$ 0.357 <sup>aA</sup>  | 2.162 $\pm$ 0.101 <sup>aA</sup>  | 4.245 $\pm$ 0.188 <sup>bA</sup> | 15.243 $\pm$ 0.291 <sup>aA</sup> | 1.246 $\pm$ 0.015 <sup>bD</sup>  | 16.485 $\pm$ 0.373 <sup>bA</sup>  |
|                     | LL           | 7.184 $\pm$ 0.488 <sup>bA</sup>  | 1.452 $\pm$ 0.089 <sup>bB</sup>  | 5.295 $\pm$ 0.338 <sup>aA</sup> | 13.932 $\pm$ 0.768 <sup>aA</sup> | 1.348 $\pm$ 0.053 <sup>abC</sup> | 19.999 $\pm$ 0.622 <sup>aA</sup>  |
|                     | <i>F</i>     | 26.261***                        | 25.966***                        | 51.441***                       | 53.008***                        | 4.367*                           | 4.786*                            |
| <i>C. hystrix</i>   | HL           | 3.083 $\pm$ 0.099 <sup>aB</sup>  | 0.693 $\pm$ 0.037 <sup>aB</sup>  | 0.731 $\pm$ 0.086 <sup>bC</sup> | 4.508 $\pm$ 0.184 <sup>bC</sup>  | 2.728 $\pm$ 0.110 <sup>bAB</sup> | 2.989 $\pm$ 0.219 <sup>aB</sup>   |
|                     | ML           | 2.157 $\pm$ 0.103 <sup>bC</sup>  | 0.457 $\pm$ 0.034 <sup>bC</sup>  | 1.219 $\pm$ 0.111 <sup>bC</sup> | 3.834 $\pm$ 0.173 <sup>bD</sup>  | 4.175 $\pm$ 0.057 <sup>aA</sup>  | 1.547 $\pm$ 0.678 <sup>aB</sup>   |
|                     | LL           | 3.384 $\pm$ 0.182 <sup>aC</sup>  | 0.743 $\pm$ 0.052 <sup>aC</sup>  | 2.262 $\pm$ 0.238 <sup>aC</sup> | 6.389 $\pm$ 0.369 <sup>aC</sup>  | 4.607 $\pm$ 0.263 <sup>aA</sup>  | 2.670 $\pm$ 0.473 <sup>aD</sup>   |
|                     | <i>F</i>     | 22.946***                        | 13.315***                        | 23.969***                       | 26.240***                        | 34.299***                        | 2.355                             |
| <i>B. alnoides</i>  | HL           | 3.850 $\pm$ 0.341 <sup>bAB</sup> | 0.994 $\pm$ 0.103 <sup>bAB</sup> | 1.723 $\pm$ 0.070 <sup>bB</sup> | 6.567 $\pm$ 0.447 <sup>bB</sup>  | 3.386 $\pm$ 0.288 <sup>aA</sup>  | 5.415 $\pm$ 0.880 <sup>abB</sup>  |
|                     | ML           | 5.662 $\pm$ 0.382 <sup>aB</sup>  | 1.372 $\pm$ 0.094 <sup>aB</sup>  | 1.822 $\pm$ 0.076 <sup>bB</sup> | 8.856 $\pm$ 0.481 <sup>aC</sup>  | 3.022 $\pm$ 0.191 <sup>aB</sup>  | 3.518 $\pm$ 0.524 <sup>bB</sup>   |
|                     | LL           | 5.325 $\pm$ 0.365 <sup>aB</sup>  | 1.203 $\pm$ 0.059 <sup>abB</sup> | 3.356 $\pm$ 0.159 <sup>aB</sup> | 9.883 $\pm$ 0.410 <sup>aB</sup>  | 2.825 $\pm$ 0.163 <sup>aB</sup>  | 6.289 $\pm$ 0.536 <sup>aC</sup>   |
|                     | <i>F</i>     | 7.045**                          | 4.658*                           | 70.030***                       | 14.424***                        | 1.665                            | 4.504*                            |
